# Supplementary material for: The osteology and affinities of Eotyrannus lengi, a tyrannosauroid theropod from the Wealden Supergroup of southern England
Source: PeerJ. 2022 Jul 7;10:e12727. doi: 10.7717/peerj.12727 (PMC9271276; doi:10.7717/peerj.12727)
Supplement: Supplemental Information 1 — List of taxa used in our analysis with a list of the references consulted for character information. [file peerj-10-12727-s001.xls]

## Sheet: OTUs
OTU	Sources for coding
Acrocanthosaurus atokensis	Stovall and Langston 1950; Harris 1998; Currie and Carpenter 2000; Eddy and Clarke 2011
Aerosteon riocoloradensis	Sereno et al. 2008
Alioramus spp.	Brusatte et al. 2012; Lü et al. 2014
Allosaurus fragilis	Gilmore 1920; Chure 2000; Madsen 1976a; MSNM V435
Aniksosaurus martini	Martinez and Novas 2006
Aorun zhaoi	Choiniere et al. 2013
Appalachiosaurus montgomeriensis	Carr et al. 2005
Arcovenator escotae	Tortosa et al. 2013
Australovenator wintonensis	Hocknull et al. 2009; White et al. 2012
Baryonyx walkeri	Charig and Milner 1997; Mateus et al. 2011
Berberosaurus liassicus	Allain et al. 2007
Bicentenaria argentina	Novas et al. 2012
Bistahieversor sealeyi	Carr and Williamson 2010
Carcharodontosaurus saharicus	Stromer 1931; Sereno et al. 1996; Brusatte and Sereno 2007
Carnotaurus sastrei	Bonaparte et al. 1990; Paulina Carabajal 2011a; Ruiz et al. 2011
Ceratosaurus spp.	Gilmore 1920; Madsen and Welles 2000
Chilantaisaurus tashuikouensis	Benson and Xu 2008
Chilesaurus diegosuarezi	Novas et al. 2015
Coelophysis rhodesiensis	Raath 1969, 1977; Colbert 1989; Bristowe and Raath 2004; Tykoski 2005
Coelurus fragilis	Carpenter et al. 2005b
Compsognathus corallestris	Peyer 2006
Concavenator corcovatus	Ortega et al. 2010
Condorraptor currumili	Rauhut 2005
Cryolophosaurus ellioti	Smith et al. 2007
Dilong paradoxus	Xu et al. 2004
Dilophosaurus wetherilli	Welles 1984
Dryptosaurus aquilunguis	Brusatte et al. 2011
Dubreuillosaurus valesdunensis	Allain 2002a, b, 2005a
Elaphrosaurus bambergi	Janensch 1925; Rauhut and Carrano 2016
Eoabelisaurus mefi	Pol and Rauhut 2012
Eoraptor lunensis	Sereno et al. 1993; Martinez et al. 2011; Sereno et al. 2013
Eotyrannus lengi	IWCMS 1997.550
Eustreptospondylus oxoniensis	Sadleir et al. 2008
Falcarius utahensis	Zanno 2010a
Fukuiraptor kitadaniensis	Azuma and Currie 2000; Currie and Azuma 2006
Gallimimus bullatus	Osmólska et al. 1972; Kobayashi and Barsbold 2006
Garudimimus brevipes	Kobayashi 2004; Kobayashi and Barsbold 2005a
Giganotosaurus carolinii	Coria and Salgado 1995; Coria and Currie 2002; Paulina Carabajal and Canale 2010
Gorgosaurus libratus	Lambe 1914a, b; Russell 1970; Currie 2003
Guanlong wucaii	Xu et al. 2006
Haplocheirus sollers	Choiniere et al. 2010b; Choiniere et al. 2014
Harpymimus oklandikovi	Kobayashi 2004; Kobayashi and Barsbold 2005b
Herrerasaurus ischigualastensis	Novas 1993; Sereno 1993; Sereno and Novas 1993; Novas 1994; Sereno 2007
Huaxiagnathus orientalis	Hwang et al. 2004
Ichthyovenator laosensis	Allain et al. 2012
Irritator challengeri	Kellner and Campos 1996; Sues et al. 2002
Juratyrant langhami	Benson 2008; Brusatte and Benson 2013
Limusaurus inextricabilis	Xu et al. 2009c
Lythronax argestes	Loewen et al. 2013
Majungasaurus crenatissimus	Sampson and Witmer 2007; Smith 2007; O'Connor 2007; Carrano 2007; Maganuco et al. 2008; Burch and Carrano 2012
Mapusaurus rosae	Coria and Currie 2006
Masiakasaurus knopfleri	Carrano et al. 2002; Carrano et al. 2011
Megalosaurus bucklandii	Benson 2010a
Megaraptor namunhuaiquii	Novas 1998; Calvo et al. 2004c; Benson et al. 2010
Monolophosaurus jiangi	Zhao and Currie 1993; Zhao et al. 2010; Brusatte et al. 2010a
MSNM V4047	Dal Sasso et al. 2005
Neovenator salerii	Brusatte et al. 2009
Noasaurus leali	Bonaparte and Powell 1980; Agnolin and Chiarelli 2010
Nqwebasaurus thwazi	de Klerk et al. 2000; Choiniere et al. 2012
Orkoraptor burkei	Novas et al. 2008
Ornitholestes hermanni	Osborn 1917; Carpenter et al. 2005
Pelecanimimus polyodon	Perez–Moreno et al. 1994
Piatnitzkysaurus floresi	Bonaparte 1986; Rauhut 2004a
Proceratosaurus bradleyi	Rauhut et al. 2010
Shaochilong maortuensis	Brusatte et al. 2010b
Siats meekerorum	Zanno and Makovicky 2013
Sinocalliopteryx gigas	Ji et al. 2007b
Sinosauropteryx prima	Currie and Chen 2001; Ji et al. 2007a
Sinotyrannus kazuoensis	Ji et al. 2009
Sinraptor dongi	Currie and Zhao 1994a; Paulina Carabajal and Currie 2012
Spinosaurus aegyptiacus*	Stromer 1915, 1934
Stokesosaurus clevelandi	Madsen 1974; Benson 2008; Brusatte and Benson 2013
Suchomimus tenerensis	Sereno et al. 1998; Lipkin et al. 2007
Syntarsus kayentakatae	Rowe 1989; Tykoski and Rowe 2004; Tykoski 2005
Tanycolagreus topwilsoni	Carpenter et al. 2005
Tawa hallae	Nesbitt et al. 2009b
Teratophoneus curriei	Carr 2005; Carr et al. 2011; Loewen et al. 2013
Torvosaurus tanneri	Galton and Jensen 1979; Britt 1991; Bakker et al. 1992; Siegwarth et al. 1996; Hanson and Makovicky 2013
Tugulusaurus faciles	Rauhut and Xu 2005
Tyrannosaurus rex	Brochu 2003; Carr and Williamson 2004
Tyrannotitan chubutensis	Novas et al. 2005
Xiongguanlong baiomensis	Li et al. 2010
Xuanhanosaurus qilixiaensis	Dong 1984
Yutyrannus huali	Xu et al. 2012
Zuolong salleei	Choiniere et al. 2010
Zupaysaurus rougieri	Ezcurra 2007; Ezcurra and Novas 2007

## Sheet: References
Agnolin, F.L. and Chiarelli, P.M. (2010). The position of the claws in Noasauridae (Dinosauria: Abelisauroidea) and its implication for abelisauroid manus evolution. Palaeontologische Zeitschrift 84(2): 293–300.
Agnolin, F.A., Powell, J.E., Novas, F.E, and Kundrát, M. (2012). New alvarezsaurid (Dinosauria, Theropoda) from uppermost Cretaceous of north–western Patagonia with associated eggs. Cretaceous Research 35: 33–56.
Allain, R. (2002a). Les Megalosauridae (Dinosauria, Theropoda). Nouvelle découverte et révision systématique: Implications phylogénétiques et paléobiogéographiques. Unpublished thesis. 329 pp.
Allain, R. (2002b). Discovery of megalosaur (Dinosauria, Theropoda) in the Middle Bathonian of Normandy (France) and its implications for the phylogeny of basal Tetanurae. Journal of Vertebrate Paleontology 22 (3): 548–563.
Allain, R. (2005a). The postcranial anatomy of the megalosaur Dubreuillosaurus valesdunensis (Dinosauria: Theropoda) from the Middle Jurassic of Normandy, France. Journal of Vertebrate Paleontology 25(4): 850–858.
Allain, R., Tykoski, R., Aquesbi, N., Jalil, N.–E., Monbaron, M., Russell, D.A. and Taquet, P. (2007). A basal abelisauroid from the late Early Jurassic of the High Atlas Mountains, Morocco, and the radiation of ceratosaurs. Journal of Vertebrate Paleontology 27 (3): 610–624.
Allain, R., Xaisanavong, T., Richir, P. and Khentavong, B. (In press). The first definitive Asian spinosaurid (Dinosauria: Theropoda) from the early cretaceous of Laos. Naturwissenschaften. doi:10.1007/s00114–012–0911–7
Azuma, Y. and Currie, P.J. 2000. A new carnosaur (Dinosauria: Theropoda) from the Lower Cretaceous of Japan. Canadian Journal of Earth Sciences 37: 1735–1753.
Benson, R.B.J. (2008). New information on Stokesosaurus, a tyrannosauroid (Dinosauria: Theropoda) from North America and the United Kingdom. Journal of Vertebrate Paleontology, 28(3): 732–750.
Benson, R.B.J. (2010a). A description of Megalosaurus bucklandii (Dinosauria: Theropoda) from the Bathonian of the UK and the relationships of Middle Jurassic theropods. Zoological Journal of the Linnean Society 158: 882–935.
Benson, R.B.J. (2010b). The osteology of Magnosaurus nethercombensis (Dinosauria, Theropoda) from the Bajocian (Middle Jurassic) of the United Kingdom and a re–examination of the oldest records of tetanurans. Journal of Systematic Palaeontology 8(1): 131–146.
Benson, R.B.J. and Radley, J.D. (2010). A new large–bodied theropod dinosaur from the Middle Jurassic of Warwickshire, United Kingdom. Acta Palaeontologica Polonica 55(1): 35–42.
Benson, R.B.J. and Xu, X. (2008). The anatomy and systematic position of the theropod dinosaur Chilantaisaurus tashuikouensis Hu, 1964 from the Early Cretaceous of Alanshan, People's Republic of China. Geological Magazine 145(6): 778–789.
Benson, R.B.J., Brusatte, S.L., Hutt, S. and Naish, D. (2009). A new large basal tetanuran (Dinosauria: Theropoda) from the Wessex Formation (Barremian) of the Isle of Wight, England. Journal of Vertebrate Paleontology 29(2): 612–615.
Benson, R.B.J., Brusatte, S.L. and Carrano, M.T. (2010). A new clade of large–bodied predatory dinosaurs (Theropoda: Allosauroidea) that survived to the latest Mesozoic. Naturwissenschaften 97: 71–78.
Bonaparte, J.F. (1986). Les dinosaures (Carnosaures, Allosauridés, Sauropodes, Cétosauridés) du Jurassique Moyen de Cerro Cóndor (Chubut, Argentina) [The dinosaurs (carnosaurs, allosaurids, sauropods, cetiosaurids) from the Middle Jurassic of Cerro Cóndor (Chubut, Argentina)]. Annales de Paléontologie 72(3): 247–289.
Bonaparte, J.F. (1991). Los vertebrados fósiles de la Formación Rio Colorado, de la Ciudad de Neuquén y Cercanías, Cretácico Superior, Argentina [The vertebrate fossils of the Rio Colorado Formation, from the city of Neuquén and surrounding areas, Upper Cretaceous, Argentina]. Revista del Museo Argentino de Ciencias Naturales "Bernardino Rivadavia" e Instituto Nacional de Investigación de las Cie…
Bonaparte, J.F. (1996). Cretaceous tetrapods of Argentina. Münchner Geowissenschaften Abhandlungen 30: 73–130.
Bonaparte J.F., Novas F.E. and Coria R.A. (1990). Carnotaurus sastrei Bonaparte, the horned, lightly built carnosaur from the Middle Cretaceous of Patagonia. Contributions in Science 416:1–42.
Bristowe, A. and Raath, M.A. (2004). A juvenile coelophysoid skull from the Early Jurassic of Zimbabwe, and the synonymy of Coelophysis and Syntarsus. Palaeontologia Africana 40: 31–41.
Britt, B.B. (1991). Theropods of Dry Mesa Quarry (Morrison Formation, Late Jurassic), Colorado, with emphasis on the osteology of Torvosaurus tanneri. Brigham Young University Geology Studies 37: 1–72.
Brochu, C.R. (2003). Osteology of Tyrannosaurus rex: insights from a nearly complete skeleton and high–resolution computed tomographic analysis of the skull. Society of Vertebrate Paleontology Memoirs 7: 1–138.
Brusatte, S.L. and Benson, R.B.J. (2013). The systematics of Late Jurassic tyrannosauroids (Dinosauria: Theropoda) from Europe and North America. Acta Palaeontologica Polonica 58(1): 47–54.
Brusatte, S.L. and Sereno, P.C. (2007). A new species of Carcharodontosaurus (Theropoda: Allosauroidea) from the Cenomanian of Niger. Journal of Vertebrate Paleontology 27: 902–917.
Brusatte S.L., Benson R.B.J. and Hutt S. (2008). The osteology of Neovenator salerii (Dinosauria: Theropoda) from the Wealden Group (Barremian) of the Isle of Wight. Monograph of the Palaeontographical Society 162(631): 1–166.
Brusatte, S.L., Benson, R.B.J. and Norell, M.A. 2011. The anatomy of Dryptosaurus aquilunguis (Dinosauria: Theropoda) and a review of its tyrannosauroid affinities. American Museum Novitates 3717: 1–53.
Brusatte, S.L., Benson, R.B.J., Currie, P.J. and Zhao, X. (2010a). The skull of Monolophosaurus jiangi (Dinosauria: Theropoda) and its implications for early theropod phylogeny and evolution. Zoological Journal of the Linnean Society 158: 573–607.
Brusatte, S.L., Carr, T.D., Erickson, G.M., Bever, G.S., and Norell, M.A. (2009). A longsnouted, multihorned tyrannosaurid from the Late Cretaceous of Mongolia. Proceedings of the National Academy of Sciences of the USA 106: 17261–17266.
Brusatte, S.L., Carr, T.D. and Norell M.A. (2012). The osteology of Alioramus, a gracile and long–snouted tyrannosaurid (Dinosauria: Theropoda) from the Late Cretaceous of Mongolia. Bulletin of the American Museum of Natural History 366: 1–197.
Brusatte, S.L., Chure, D.J., Benson, R.B.J. and Xu, X. (2010b). The osteology of Shaochilong maortuensis, a carcharodontosaurid (Dinosauria: Theropoda) from the Late Cretaceous of Asia. Zootaxa 2334: 1–46.
Burch, S.H. and Carrano, M.T. (2012). An articulated pectoral girdle and forelimb of the abelisaurid theropod Majungasaurus crenatissimus from the Late Cretaceous of Madagascar, Journal of Vertebrate Paleontology 32: 1–16.
Calvo, J.O., Porfiri, J.D., Veralli, C., Novas, F.E. and Poblete, F. (2004b). Phylogenetic status of Megaraptor namunhuaiquii Novas based on a new specimen from Neuquén, Patagonia, Argentina. Ameghiniana 41: 565–575.
Calvo, J., Rubilar–Rogers, D. and Moreno, K. (2004c). A new Abelisauridae (Dinosauria: Theropoda) from northwest Patagonia. Ameghiniana 41(4): 555–563.
Canale, J.I., Scanferla, C.A., Agnolin, F. and Novas, F.E. (2009). New carnivorous dinosaur from the Late Cretaceous of NW Patagonia and the evolution of abelisaurid theropods. Naturwissenschaften 96(3): 409–414.
Carpenter, K., Miles, C.A. and Cloward, K.C. (2005a). New small theropod from the Upper Jurassic Morrison Formation of Wyoming. In K. Carpenter (ed.), The Carnivorous Dinosaurs. Indiana University Press, Bloomington 23–48.
Carpenter, K., Miles, C.A., Ostrom, J.H. and Cloward, K.C. (2005b). Redescription of the small maniraptoran theropods Ornitholestes and Coelurus from the Upper Jurassic Morrison Formation of Wyoming. In K. Carpenter (ed.), The Carnivorous Dinosaurs. Indiana University Press, Bloomington 49–71.
Carr, T.D. and Williamson, T.E. (2004). Diversity of late Maastrichtian Tyrannosauridae (Dinosauria: Theropoda) from western North America. Zoological Journal of the Linnean Society 142 (4): 479–523.
Carr, T.D. and Williamson, T.E. (2010). Bistahieversor sealeyi, gen. et sp. nov., a new tyrannosauroid from New Mexico and the origin of deep snouts in Tyrannosauroidea. Journal of Vertebrate Paleontology, 30(1): 1–16.
Carr, T.D., Williamson, T.E. and Schwimmer, D.R. (2005). A new genus and species of tyrannosauroid from the Late Cretaceous (middle Campanian) Demopolis Formation of Alabama. Journal of Vertebrate Paleontology 25 (1): 119–143.
Carr, T.D., Williamson, T.E., Britt, B.B. and Stadtman, K. (2011). Evidence for high taxonomic and morphologic tyrannosauroid diversity in the Late Cretaceous (Late Campanian) of the American Southwest and a new short–skulled tyrannosaurid from the Kaiparowits formation of Utah. Naturwissenschaften 98(3): 241–246.
Carrano, M.T. (2007). The appendicular skeleton of Majungasaurus crenatissimus (Theropoda: Abelisauridae) from the Late Cretaceous of Madagascar. Society of Vertebrate Paleontology Memoir 8: 163–179.
Carrano, M.T. and Sampson, S.D. (2004). A review of coelophysoids (Dinosauria: Theropoda) from the Early Jurassic of Europe, with comments on the late history of the Coelophysoidea. Neues Jahrbuch für Geologie und Paläontologie Monatshefte 9: 537–558.
Carrano, M.T., Loewen, M.A. and Sertic, J.J.W. (2011). New materials of Masiakasaurus knopfleri Sampson, Carrano, and Forster, 2001, and implications for the morphology of the Noasauridae (Theropoda: Ceratosauria). Smithsonian Contributions to Paleobiology 95: 1–53.
Carrano, M.T., Sampson, S.D. and Forster, C.A. (2002). The osteology of Masiakasaurus knopfleri, a small abelisauroid (Dinosauria: Theropoda) from the Late Cretaceous of Madagascar. Journal of Vertebrate Paleontology 22 (3): 510–534.
Charig, A.J. and Milner, A.C. (1997). Baryonyx walkeri, a fish–eating dinosaur from the Wealden of Surrey. Bulletin of the Natural History Museum of London, 53: 11–70.
Choiniere, J.N., Clark, J.M., Forster, C.A, and Xu, X. (2010a). A basal coelurosaur (Dinosauria: Theropoda) from the Late Jurassic (Oxfordian) of the Shishugou Formation in Wucaiwan, People's Republic of China. Journal of Vertebrate Paleontology 30(6): 1773–1796.
Choiniere, J.N., Clark, J.M., Forster, C.A., Norell, M.A., Eberth, D.A., Erickson, G.M., Chu, H. and Xu, X. (2013). A juvenile specimen of a new coelurosaur (Dinosauria: Theropoda) from the Middle–Late Jurassic Shishugou Formation of Xinjiang, People's Republic of China. Journal of Systematic Palaeontology DOI:10.1080/14772019.2013.781067.
Choiniere, J.N., Forster, C.A., De Klerk, W.J. (2012). New information on Nqwebasaurus thwazi, a coelurosaurian theropod from the Early Cretaceous (Hauteriverian?) Kirkwood Formation in South Africa. Journal of African Earth Sciences 71-72: 1–17.
Choiniere, J.N., Xu, X., Clark, J.M., Forster, C.A., Guo, Y. and Han, F. (2010b). A basal alvarezsauroid theropod from the Early Late Jurassic of Xinjiang, China. Science 327 (5965): 571–574.
Chure, D.J. (2000). A new species of Allosaurus from the Morrison Formation of Dinosaur National Monument (Utah–Colorado) and a revision of the theropod family Allosauridae. Ph.D. dissertation. Columbia University.
Colbert, E. (1989). The Triassic Dinosaur Coelophysis. Museum of Northern Arizona Bulletin 57: 1–160.
Coria, R.A. and Currie, P.J. (2002). Braincase of Giganotosaurus carolinii (Dinosauria: Theropoda) from the Upper Cretaceous of Argentina. Journal of Vertebrate Paleontology, 22(4): 802–811.
Coria R.A. and Currie P.J. (2006). A new carcharodontosaurid (Dinosauria, Theropoda) from the Upper Cretaceous of Argentina. Geodiversitas 28(1): 71–118.
Coria R.A. and Salgado L. (1995). A new giant carnivorous dinosaur from the Cretaceous of Patagonia. Nature 377: 225–226.
Currie, P.J. and Azuma, Y. (2006). New specimens, including a growth series, of Fukuiraptor (Dinosauria, Theropoda) from the Lower Cretaceous Kitadani Quarry of Japan. Journal of the Paleontological Society of Korea 22(1): 173–193.
Currie, P.J. and Carpenter, K. (2000). A new specimen of Acrocanthosaurus atokensis (Theropoda, Dinosauria) from the Lower Cretaceous Antlers Formation (Lower Cretaceous, Aptian) of Oklahoma, USA. Geodiversitas 22 (2): 207–246.
Currie, P.J. and Chen, P.–J. (2001). Anatomy of Sinosauropteryx prima from Liaoning, northeastern China. Canadian Journal of Earth Sciences 38(1): 705–727.
Currie, P.J. and Zhao, X.–J. (1994a). A new carnosaur (Dinosauria, Theropoda) from the Jurassic of Xinjiang, People's Republic of China. Canadian Journal of Earth Sciences 30(10–11): 2037–2081.
Dal Sasso, C., Maganuco, S., Buffetaut, E. and Mendez, M.A. (2005). New information on the skull of the enigmatic theropod Spinosaurus, with remarks on its sizes and affinities. Journal of Vertebrate Paleontology 25(4): 888–896.
de Klerk, W.J., Forster, C.A., Sampson, S.D., Chinsamy, A. and Ross, C.F. (2000). A new coelurosaurian dinosaur from the Early Cretaceous of South Africa. Journal of Vertebrate Paleontology 20(2): 324–332.
Dong, Z. (1984). A new theropod dinosaur from the Middle Jurassic of Sichuan Basin. Vertebrata PalAsiatica 22(3): 213–218.
Dong, Z., Zhou, Z. and Zhang, H. (1983). [Dinosaurs from the Jurassic of Sichuan]. Palaeontologica Sinica, New Series C 23: (Whole Number 162), 1–136 [In Chinese].
Eddy, D.R. And Clarke, J.A. (2011). New information on the cranial anatomy of Acrocanthosaurus atokensis and its implications for the phylogeny of Allosauroidea (Dinosauria: Theropoda). PLoS One 6 (3): e17932.
Ezcurra, M.D. (2006). A review of the systematic position of the dinosauriform archosaur Eucoelophysis baldwini Sullivan & Lucas, 1999 from the Upper Triassic of New Mexico, USA. Geodiversitas, 28(4): 649–684.
Ezcurra, M.D. (2007). The cranial anatomy of the coelophysoid theropod Zupaysaurus rougieri from the Upper Triassic of Argentina. Historical Biology 19(2): 185–202.
Ezcurra, M.D. and Novas, F.E. (2007). Phylogenetic relationships of the Triassic theropod Zupaysaurus rougieri from NW Argentina. Historical Biology 19(1): 35–72.
Galton, P.M. and Jensen, J.A. (1979). A new large theropod dinosaur from the Upper Jurassic of Colorado. Brigham Young University Geology Studies 26(1): 1–12.
Gilmore, C.W. (1920). Osteology of the carnivorous dinosauria in the United States National Museum, with special reference to the genera Antrodemus (Allosaurus) and Ceratosaurus. Bulletin of the United States National Museum 110: 1–159.
Hanson, M. and Makovicky, P.J. (2013) A new specimen of Torvosaurus tanneri originally collected by Elmer Riggs. Historical Biology doi:10.1080/08912963.2013.853056.
Harris, J.D. (1998). A reanalysis of Acrocanthosaurus atokensis, its phylogenetic status, and paleobiological implications, based on a new specimen from Texas. New Mexico Museum of Natural History and Science Bulletin 13: 1–75.
Hendrickx, C. and Mateus, O. (2014). Torvosaurus gurneyi n. sp., the Largest Terrestrial Predator from Europe, and a Proposed Terminology of the Maxilla Anatomy in Nonavian Theropods. PLoS ONE 9(3): e88905.
Hwang, S.H., Norell, M.A., Ji, Q. and Gao, K. (2002). New specimens of Microraptor zhaoianus (Theropoda: Dromaeosauridae) from Northeastern China. American Museum Novitates 3381: 1–44.
Hwang, S.H., Norell, M.A., Ji,Q. and Gao, K. (2004). A large compsognathid from the Early Cretaceous Yixian Formation of China. Journal of Systematic Palaeontology, 2(1): 13–30.
Janensch, W. 1925. Die Coelurosaurier und Theropoden der Tendaguru–Schichten Deutsch–Ostafrikas [The coelurosaurs and theropods of the Tendaguru Formation of German East Africa]. Palaeontographica, Supplement VII (1) 1(1):1–100.
Ji, Q., Ji, S.–A. and Zhang, L.–J. (2009). First large tyrannosauroid theropod from the Early Cretaceous Jehol Biota in northeastern China. Geological Bulletin of China 28(10): 1369–1374.
Ji, S., Gao, C., Liu, J., Meng, Q. and Ji, Q. (2007a). New material of Sinosauropteryx (Theropoda: Compsognathidae) from western Liaoning, China. Acta Geologica Sinica (English Edition) 81(2): 177–182.
Ji, S., Ji, Q., Lu J. and Yuan, C. (2007b). A new giant compsognathid dinosaur with long filamentous integuments from Lower Cretaceous of Northeastern China. Acta Geologica Sinica 81(1): 8–15.
Kobayashi, Y. (2004). Asian ornithomimosaurs. PhD Thesis. Southern Methodist University.
Kobayashi, Y. and Barsbold, R. (2005a). Reexamination of a primitive ornithomimosaur, Garudimimus brevipes Barsbold, 1981 (Dinosauria: Theropoda), from the Late Cretaceous of Mongolia. Canadian Journal of Earth Sciences, 42: 1501–1521.
Kobayashi, Y. and Barsbold, R. (2005b). Anatomy of Harpymimus okladnikovi Barsbold and Perle 1984 (Dinosauria; Theropoda) of Mongolia. In Carpenter, K. (ed.) The Carnivorous Dinosaurs. Indiana University Press: 97–126.
Kobayashi, Y. and Barsbold, R. (2006). Ornithomimids from the Nemegt Formation of Mongolia. Journal of the Paleontological Society of Korea, 22(1): 195–207.
Li, D., Norell, M.A., Gao, K.–Q., Smith, N.D. and Makovicky, P.J. (2010). A longirostrine tyrannosauroid from the Early Cretaceous of China. Proceedings of the Royal Society B: Biological Sciences 277 (1679): 183–190.
Li, F., Peng, G., Ye, Y., Jiang, S. and Huang, D. (2009). A new carnosaur from the Late Jurassic of Qianwei, Sichuan, China. Acta Geologica Sinica 83(9): 1203–1213.
Lipkin, C., Sereno, P.C. and Horner, J.R. (2007). The furcula in Suchomimus tenerensis and Tyrannosaurus rex (Dinosauria: Theropoda: Tetanurae). Journal of Paleontology 81(6): 1523–1527.
Loewen, M.A., Irmis, R.B., Sertich, J.J.W., Currie, P.J., Sampson, S.D. (2013). Tyrant dinosaur evolution tracks the rise and fall of Late Cretaceous oceans. PLoS ONE 8(11): e79420. doi:10.1371/journal.pone.0079420.
Longrich, N. (2002). Systematics of Sinosauropteryx. Journal of Vertebrate Paleontology 22 (supplement to 3): 80A.
Lü, J., Yi, L., Brusatte, S.L., Yang, L.,Li, H., and Chen, L. (2014). A new clade of Asian Late Cretaceous long-snouted tyrannosaurids. Nature Communications 5:3788 doi: 10.1038/ncomms4788.
Madsen, J.H. (1974). A new theropod dinosaur from the Upper Jurassic of Utah. Journal of Paleontology 48: 27–31.
Madsen, J.H. (1976a). Allosaurus fragilis: A Revised Osteology. Utah Geological Survey Bulletin 109 (2nd ed.). Salt Lake City: Utah Geological Survey.
Madsen, J.H. (1976b). A second new theropod dinosaur from the Late Jurassic of east central Utah. Utah Geology 3(1): 51–60.
Madsen, J.H. and Welles, S.P. (2000). Ceratosaurus (Dinosauria, Theropoda): A Revised Osteology. Utah Geological Survey: 1–80.
Makovicky, P.J., Li, D., Gao, K.–Q., Lewin, M., Erickson, G.M. and Norell, M.A. (2010). A giant ornithomimosaur from the Early Cretaceous of China. Proceedings of the Royal Society B: Biological Sciences 277 (1679): 191–198.
Martínez, R.D. and Novas, F.E. (2006). Aniksosaurus darwini gen. et sp. nov., a new coelurosaurian theropod from the early Late Cretaceous of central Patagonia, Argentina. Revista del Museo Argentino de Ciencias Naturales, n.s. 8(2): 243–259.
Mateus, O., Araújo, R., Natário, C., Castanhinha, R. (2011). A new specimen of the theropod dinosaur Baryonyx from the early Cretaceous of Portugal and taxonomic validity of Suchosaurus. Zootaxa 2827: 54–68.
Mo, J., Zhou, F., Li, G.-N., Hunag, Z., and Cao, C. (2014). A new carcharodontosauria (Theropoda) from the Early Cretaceous of Guangxi, Southern China. Acta Geologica Sinica 88: 1051–1059.
Naish, D. (2006). The osteology and affinities of Eotyrannus lengi and other Lower Cretaceous theropod dinosaurs from England. PhD Thesis. University of Portsmouth.
Novas, F.E. (1993). New information on the systematics and postcranial skeleton of Herrerasaurus ischigualastensis (Theropoda: Herrerasauridae) from the Ischigualasto Formation (Upper Triassic) of Argentina. Journal of Vertebrate Paleontology 13(4): 400–423.
Novas, F.E. (1998). Megaraptor namunhuaiquii, gen. et sp. nov., a large–clawed, Late Cretaceous theropod from Patagonia. Journal of Vertebrate Paleontology 18: 4–9.
Novas, F.E., Ezcurra, M.D. and Lecuona, A. (2008). Orkoraptor burkei nov. gen. et sp., a large theropod from the Maastrichtian Pari Aike Formation, Southern Patagonia, Argentina. Cretaceous Research 29 (3): 468–480.
Novas F.E., Salgado L., Suarez M., Agnolin F.L., Ezcurra M., Chimento N.R., De La Cruz R., Isasi M., Vargas A.O., Rubilar-Roger D. (2015). An enigmatic plant-eating theropod from the Late Jurassic period of Chile. Nature doi:10.1038/nature14307
Ortega, F., Escaco, F. and Sanz, J.L. (2010). A bizarre, humped Carcharodontosauria (Theropoda) from the Lower Cretaceous of Spain. Nature 467: 203–206.
Osborn, H.F. (1917). Skeletal adaptations of Ornitholestes, Struthiomimus, Tyrannosaurus. Bulletin of the American Museum of Natural History 35(43): 733–771.
Osborn, H.F. (1924). Three new Theropoda, Protoceratops zone, central Mongolia. American Museum Novitates, 144: 1–12.
Osmólska, H., Roniewicz, E. and Barsbold, R. (1972). A new dinosaur, Gallimimus bullatus n. gen., n. sp. (Ornithomimidae) from the Upper Cretaceous of Mongolia. Palaeontologia Polonica 27: 103–143.
Ostrom, J.H. (1978). The osteology of Compsognathus longipes Wagner. Zitteliana 4: 73–118.
Paulina Carabajal, A. (2011a). The braincase anatomy of Carnotaurus sastrei (Theropoda: Abelisauridae) from the Upper Cretaceous of Patagonia. Journal of Vertebrate Paleontology 31(2): 378–386.
Paulina Carabajal, A. (2011b). Braincases of Abelisaurid Theropods from the Upper Cretaceous of North Patagonia. Palaeontology 54(4): 793–806.
Paulina Carabajal, A. and Canale, J.I. (2010). Cranial endocast of the carcharodontosaurid theropod Giganotosaurus carolinii Coria & Salgado, 1995. Neues Jahrbuch fuer Geologie & Palaeontologie, Abhandlungen 258(2): 249–256.
Paulina Carabajal, A., Currie, P.J., (2012). New Information on the braincase of Sinraptor dongi (Theropoda: Allosauroidea): ethmoidal region, endocranial anatomy, and pneumaticity. Vertebrata PalAsiatica 50: 85–101.
Perez–Moreno, B.P., Sanz, J.L., Buscalioni, A.D., Moratalla, J.J., Ortega, F. and Raskin–Gutman, D. (1994). A unique multitoothed ornithomimosaur from the Lower Cretaceous of Spain. Nature 370: 363–367.
Peyer, K. (2006). A reconsideration of Compsognathus from the upper Tithonian of Canjuers, southeastern France. Journal of Vertebrate Paleontology 26(4): 879–896.
Pol, D. and Rauhut, O.W.M. (2012). A Middle Jurassic abelisaurid from Patagonia and the early diversification of theropod dinosaurs. Proceedings of the Royal Society B 279: 3170–3175.
Raath, M.A. (1969). A new coelurosaurian dinosaur from the Forest Sandstone of Rhodesia. Arnoldia Rhodesia. 4 (28): 1–25.
Raath, M. A. (1977). The anatomy of the Triassic theropod Syntarsus rhodesiensis (Saurischia: Podokesauridae) and a consideration of its biology. Ph.D. dissertation, Rhodes University, Salisbury, Rhodesia, 233 pp.
Rauhut, O.W.M. (2004a). Braincase structure of the Middle Jurassic theropod dinosaur Piatnitzkysaurus. Canadian Journal of Earth Science 41: 1109–1122.
Rauhut, O.W.M. (2005). Osteology and relationships of a new theropod dinosaur from the Middle Jurassic of Patagonia. Palaeontology. 48(1): 87–110.
Rauhut, O.W.M. (2011). Theropod dinosaurs from the Late Jurassic of Tendaguru (Tanzania). Special Papers in Palaeontology 86: 195–239.
Rauhut O.W.M., Carrano M.T. (2016). The theropod dinosaur Elaphrosaurus bambergi Janensch, 1920, from the Late Jurassic of Tendaguru, Tanzania. Zoological Journal of the Linnean Society (In press)
Rauhut, O.W.M. and Xu, X. (2005). The small theropod dinosaurs Tugulusaurus and Phaedrolosaurus from the Early Cretaceous of Xinjiang, China. Journal of Vertebrate Paleontology 25(1): 107–118.
Rauhut, O.W.M., Milner, A.C. and Moore–Fay, S. (2010). Cranial osteology and phylogenetic position of the theropod dinosaur Proceratosaurus bradleyi (Woodward, 1910) from the Middle Jurassic of England. Zoological Journal of the Linnean Society 158(1): 155–195.
Rowe, T.E. (1989). A new species of the theropod dinosaur Syntarsus from the Early Jurassic Kayenta Formation of Arizona. Journal of Vertebrate Paleontology 9(2): 125–136.
Ruiz J., Torices A., Serrano H., and Valle L. (2011). The hand structure of Carnotaurus sastrei (Theropoda, Abelisauridae): implications for hand diversity and evolution in Abelisaurids. Palaeontology 54(6): 1271–1277.
Russell, D.A. (1996). Isolated dinosaur bones from the Middle Cretaceous of the Tafilalt, Morocco. Bulletin du Muséum National d'Histoire Naturelle, Paris, 4e série, section C 18 (2–3): 349–402.
Sadleir, R., Barrett, P. M. and Powell, H. P. (2008). The anatomy and systematics of Eustreptospondylus oxoniensis, a theropod dinosaur from the Middle Jurassic of Oxfordshire, England. Monograph of the Palaeontographical Society, London 160(627): 1–82.
Sampson, S.D. and Witmer, L.M. (2007). Craniofacial anatomy of Majungasaurus crenatissimus (Theropoda: Abelisauridae) from the Late Cretaceous of Madagascar. Society of Vertebrate Paleontology Memoir 8: 32–102.
Sereno, P.C. (1993). The pectoral girdle and forelimb of the basal theropod Herrerasaurus ischigualastensis. Journal of Vertebrate Paleontology 13(4): 425–450.
Sereno, P.C. and Brusatte, S.L. (2008). Basal abelisaurid and carcharodontosaurid theropods from the Lower Cretaceous Elrhaz Formation of Niger. Acta Palaeontologica Polonica 53 (1): 15–46.
Sereno, P.C. and Novas, F.E. (1993). The skull and neck of the basal theropod Herrerasaurus ischigualastensis. Journal of Vertebrate Paleontology 13 (4): 451–476.
Sereno, P.C., Beck, A.L., Dutheil, D.B., Gado, B., Larsson, H.C.E., Lyon, G.H., Marcot, J.D., Rauhut, O.W.M., Sadleir, R.W., Sidor, C.A., Varricchio, D.D., Wilson, G.P and Wilson, J.A. (1998). A long–snouted predatory dinosaur from Africa and the evolution of spinosaurids. Science 282 (5392): 1298–1302.
Sereno, P.C., Dutheil, D.B., Iarochene, M., Larsson, H.C.E., Lyon, G.H., Magwene, P.M., Sidor, C.A., Varricchio, D.J., and Wilson, J.A. (1996). Predatory dinosaurs from the Sahara and Late Cretaceous faunal differentiation. Science 272: 986–991.
Sereno, P.C., Forster, C.A., Rogers, R.R. and Monetta, M.A. (1993). Primitive dinosaur skeleton from Argentina and the early evolution of Dinosauria. Nature 361: 64–66.
Sereno, P.C., Martinez, R.N., Wilson, J.A., Varricchio, D.J., Alcober, O.A. and Larsson, H.C.E. (2008). Evidence for avian intrathoracic air sacs in a new predatory dinosaur from Argentina. PLoS One 3(9): e3303.
Sereno, P.C., Wilson, J.A., Larsson, H.C.E., Dutheil, D.B. and Sues, H–D. (1994). Early Cretaceous dinosaurs from the Sahara. Science 266: 267–270.
Smith, J.B. (2007). Dental morphology and variation in Majungasaurus crenatissimus (Theropoda: Abelisauridae) from the Late Cretaceous of Madagascar. Society of Vertebrate Paleontology Memoir 8: 103–126.
Smith, N.D., Makovicky, P.J., Hammer, W.R. and Currie, P.J. (2007). Osteology of Cryolophosaurus ellioti (Dinosauria: Theropoda) from the Early Jurassic of Antarctica and implications for early theropod evolution. Zoological Journal of the Linnean Society 151(2): 377–421.
Stovall, J. W. and Langston, W. (1950). Acrocanthosaurus atokensis, a new genus and species of Lower Cretaceous Theropoda from Oklahoma. American Midland Naturalist (American Midland Naturalist, Vol. 43, No. 3) 43 (3): 696–728.
Stromer, E. (1915). Ergebnisse der Forschungsreisen Prof. E. Stromers in den Wüsten Ägyptens. II. Wirbeltier–Reste der Baharije–Stufe (unterstes Cenoman). 3. Das Original des Theropoden Spinosaurus aegyptiacus nov. gen., nov. spec. (in German). Abhandlungen der Königlich Bayerischen Akademie der Wissenschaften, Mathematisch–physikalische Klasse 28 (3): 1–32.
Stromer, E. (1931). Wirbeltiere–Reste der Baharijestufe (unterestes Canoman). Ein Skelett–Rest von Carcharodontosaurus nov. gen. Abhandlungen der Bayerischen Akademie der Wissenschaften, Mathematisch–naturwissenschaftliche Abteilung, 9 (Neue Folge): 1–23.
Stromer, E. (1934). Ergebnisse der Forschungsreisen Prof. E. Stromers in den Wüsten Ägyptens. II. Wirbeltierreste der Baharîje–Stufe (unterstes Cenoman). 13. Dinosauria [Results of the expeditions of Professor E. Stromer in the Egyptian deserts. II. Vertebrate animal remains from the Baharîje bed (lowest Cenomanian). 13. Dinosauria]. Abhandlungen der Bayerischen Akademie der Wissenschaften Mathem…
Sues, H.–D., Frey, E., Martill, D.M. and Scott, D.M. (2002). Irritator challengeri, a spinosaurid (Dinosauria: Theropoda) from the Lower Cretaceous of Brazil. Journal of Vertebrate Paleontology 22 (3): 535–547.
Tortosa, T., Buffeatut, E., Vialle, N., Dutour, Y., Turini, E., and Cheylan, G. (2013). A new abelisaurid dinosaur from the Late Cretaceous of southern France: Palaeobiogeographical implications. Annales de Paléontologie doi.org/10.1016/j.annpal.2013.10.003
Tykoski, R.S. (2005). Anatomy, ontogeny, and phylogeny of coelophysoid theropods. PhD dissertation, University of Texas at Austin.
Tykoski, T.S. and Rowe, T.E. (2004). Ceratosauria. In D. B. Weishampel, P. Dodson, and H. Osmolska (eds.), The Dinosauria (second edition). University of California Press, Berkeley 47–70.
Welles, S.P. (1984). Dilophosaurus wetherilli (Dinosauria, Theropoda), osteology and comparisons. Palaeontographica Abt. A 185: 85–180.
White, M.A., Cook, A.G., Hocknull, S.A., Sloan, T., Sinapius, G.H.K. and Elliot, D.A. (2012). New forearm elements discovered of holotype specimen Australovenator wintonensis from Winton, Queensland, Australia. PLoS ONE 7(6): e39364.
Xu, X., Clark, J.M., Forster, C.A., Norell, M.A., Erickson, G.M., Eberth, D.A., Jia, C. and Zhao, Q. (2006). A basal tyrannosauroid dinosaur from the Late Jurassic of China. Nature 439 (7077): 715–718.
Xu, X., Clark, J.M., Mo, J., Choiniere, J., Forster, C.A., Erickson, G.M., Hone, D.W.E., Sullivan, C., Eberth, D.A., Nesbitt, S., Zhao, Q., Hernandez, R., Jia, C.–K., Han, F.–L., and Guo, Y. (2009c). A Jurassic ceratosaur from China helps clarify avian digital homologies. Nature, 459(18): 940–944.
Xu, X., Norell, M.A., Kuang, X., Wang, X., Zhao, Q., Jia, C. (2004). Basal tyrannosauroids from China and evidence for protofeathers in tyrannosauroids. Nature 431 (7009): 680–684.
Zanno, L.E. (2006). The pectoral girle and forelimb of the primitive therizinosauroid Falcarius utahensis (Theropoda, Maniraptora): Analyzing evolutionary trends within Therizinosauroidea. Journal of Vertebrate Paleontology 26(3): 636–650.
Zanno, L.E. (2010a). Osteology of Falcarius utahensis: characterizing the anatomy of basal therizinosaurs. Zoological Journal of the Linnaean Society 158: 196–230.
Zanno, L.E. and Makovicky, J.P. (2013). Neovenatorid theropods are apex predators in the Late Cretaceous of North America Nature Communications 4: 2827 doi:10.1038/ncomms3827.
Zhao, X.–J. and Currie, P.J. (1993). A large crested theropod from the Jurassic of Xinjiang, People's Republic of China. Canadian Journal of Earth Sciences 30: 2027–2036.
Zhao, X., Benson, R.B.J., Brusatte, S.L. and Currie, P.J. (2010). The postcranial skeleton of Monolophosaurus jiangi (Dinosauria: Theropoda) from the Middle Jurassic of Xinjiang, China, and a review of Middle Jurassic Chinese theropods. Geological Magazine 147(1): 13–27.
